# Supplementary material for: Plant Trait Assembly in Species-Rich Forests at Varying Elevations in the Northwest Andes of Colombia
Source: MDPI journal article supplement (doi:10.3390/land10101057), 2021-10-08
Supplement: s1 [file s1]

## Supplementary Tables and Figures

**Table S1.** Climatic values per plot in the northwestern Andean mountains, Colombia. Mean annual temperature-MAT (°C), mean annual precipitation-MAP (mm), temperature seasonality-T.s (°C), precipitation seasonality-Ps (mm), wind speed-Wind (m/s) and solar radiation- S.rad (KJ m<sup>-1</sup> day<sup>-1</sup>) were downloaded from the free climate data set Woldclim version 2.1. (1970–2000) with a resolution of 30 arcsec–1 km. Vapor pressure deficit-DVP (KPa) was calculated as the difference between the moisture in the air and the moisture that the air can hold when it is saturated ( $DVP = SVP - VAP$ ), with  $SVP = \frac{610.7 \times 10^{7.5T}}{237.3 + T}$ .

| Site           | Elev | MAP  | MAT  | T.s   | P.s   | VAP  | Wind | SRad      | VPD  |
|----------------|------|------|------|-------|-------|------|------|-----------|------|
| Carepa         | 58   | 2518 | 26   | 25.79 | 47.16 | 2.93 | 1.71 | 18,320.58 | 0.71 |
| Puerto Triunfo | 180  | 2788 | 27   | 35.05 | 41.00 | 2.87 | 0.89 | 17,640.42 | 0.86 |
| Segovia        | 717  | 3803 | 23.2 | 33.13 | 41.44 | 2.52 | 1.08 | 17,852.58 | 0.55 |
| Porce          | 1006 | 2108 | 21.9 | 41.97 | 42.04 | 2.28 | 0.97 | 17,722.67 | 0.56 |
| Maceo          | 1016 | 3014 | 22.6 | 40.64 | 33.46 | 2.35 | 0.92 | 17,739.00 | 0.61 |
| Anorí          | 1784 | 4354 | 17.5 | 46.73 | 43.04 | 1.81 | 1.07 | 17,830.42 | 0.52 |
| Angelópolis    | 2118 | 2197 | 16.2 | 33.95 | 38.27 | 1.58 | 0.98 | 17,488.33 | 0.41 |
| Jardín         | 2525 | 2617 | 14.6 | 20.49 | 35.89 | 1.45 | 0.96 | 17,354.17 | 0.21 |
| Belmira        | 2885 | 2203 | 11.9 | 32.97 | 48.35 | 1.20 | 1.17 | 17,624.08 | 0.26 |

**Table S2.** Soil values per plot in the northwestern Andean mountains, Colombia. pH: measured potentiometric method in a ratio of 1 to 2, MO: organic matter measured combustion method (%), Ca (calcium), Mg (magnesium), and K (potassium) cations were determined by atomic absorption spectrophotometry using neutral and 1N ammonium acetate (meq per 100 g soil), P: phosphorus determined by ultraviolet-visible spectrophotometry (ppm), probability of association per place with EcM (ectomycorrhizas), AM (arbuscular mycorrhizas), and Nfix (nitrogen-fixing bacteria).

| Site           | Elev | pH    | MO     | P     | Ca    | Mg    | K      | EcM  | AM   | Nfix |
|----------------|------|-------|--------|-------|-------|-------|--------|------|------|------|
| Carepa         | 58   | 5.78  | 7.7    | 0.87  | 11.28 | 7.39  | 0.22   | 0.02 | 0.49 | 0.04 |
| Puerto Triunfo | 180  | 6.058 | 8.4737 | 35.32 | 5.18  | 6.08  | 0.13   | 0.06 | 0.58 | 0.13 |
| Segovia        | 717  | 3.94  | 6.65   | 1.08  | 0.32  | 0.116 | 0.0764 | 0    | 0.73 | 0.06 |
| Porce          | 1006 | 4.18  | 4.52   | 4.28  | 0.116 | 0.132 | 0.0848 | 00   | 0.78 | 0.04 |
| Maceo          | 1016 | 3.562 | 5.424  | 1.67  | 0.42  | 0.17  | 0.238  | 0.01 | 0.66 | 0.02 |
| Anorí          | 1784 | 3.87  | 4.33   | 5.52  | 0.291 | 0.104 | 0.172  | 0.04 | 0.81 | 0.04 |
| Angelópolis    | 2118 | 4.74  | 23.3   | 14.1  | 9.29  | 1.52  | 0.258  | 0.02 | 0.72 | 0    |
| Jardín         | 2525 | 4.781 | 12.199 | 4.8   | 0.312 | 0.127 | 0.185  | 0    | 0.78 | 0    |
| Belmira        | 2885 | 3.57  | 28.5   | 4.38  | 0.142 | 0.109 | 0.145  | 0.25 | 0.72 | 0.02 |

**Table S3.** Community weight mean (CWM) of the six traits. LA: leaf area (mm<sup>2</sup>), SLA: specific leaf area (mm<sup>2</sup> mg<sup>-1</sup>), LDMC: leaf dry matter content (mg g<sup>-1</sup>), LT: thickness (mm), Lth: toughness (N mm), and WD: wood density (g cm<sup>-3</sup>).

| Site                      | LA        | SLA   | LDMC   | LT   | Lth  | WD   |
|---------------------------|-----------|-------|--------|------|------|------|
| Carepa (58 masl)          | 30,008.55 | 19.87 | 339.48 | 0.19 | 0.24 | 0.50 |
| Puerto Triunfo (180 masl) | 19,362.02 | 12.83 | 447.25 | 0.20 | 0.35 | 0.68 |
| Segovia (717 masl)        | 24,318.90 | 15.06 | 344.39 | 0.22 | 0.28 | 0.59 |
| Porce (1006 masl)         | 32,310.38 | 12.38 | 409.48 | 0.24 | 0.32 | 0.57 |
| Maceo (1016 masl)         | 16,608.01 | 16.94 | 352.91 | 0.25 | 0.27 | 0.59 |
| Anorí (1784 masl)         | 14,764.42 | 11.52 | 365.61 | 0.28 | 0.33 | 0.57 |
| Angelópolis (2188 masl)   | 12,786.70 | 13.61 | 344.09 | 0.28 | 0.33 | 0.54 |
| Jardín (2525 masl)        | 16,292.80 | 12.16 | 329.63 | 0.31 | 0.28 | 0.49 |
| Belmira (2855 masl)       | 9292.93   | 10.10 | 359.29 | 0.34 | 0.41 | 0.52 |

**Figure S1.** Sample plot design diagram. The arrows indicate the sequence followed for the individual numbering within the  $20 \times 20$  quadrants and through each  $20 \times 100$  strip. The box with the thickest line corresponds to the subplot of  $40 \times 40$  m (0.16 ha), where the 1 cm individuals were included. Blue points show soil samples inside a  $20\text{m} \times 20$  m quadrant.

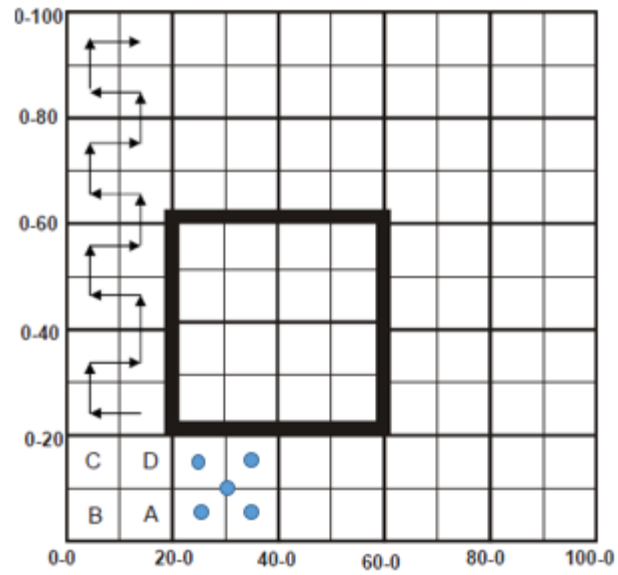

**Figure S2.** Correlation between elevation and environmental variables. **(a)** Climate: MAT: mean annual temperature (°C), MAP: mean annual precipitation (mm), T.s: temperature seasonality (°C), P.s: precipitation seasonality (mm), VAP: water vapor pressure (KPa), Wind: wind speed (m/s), SRad: solar radiation (KJ m<sup>-1</sup> day<sup>-1</sup>), DVP: vapor pressure deficit (KPa). **(b)** soil and symbiotic association: MO: organic matter (%), Ca (calcium), Mg (magnesium), and K (potassium) cations (meq per 100 g soil), P: phosphorus (ppm), probability of association per place with EcM (ectomycorrhizas), AM (arbuscular mycorrhizas), and Nfix (nitrogen-fixing bacteria).

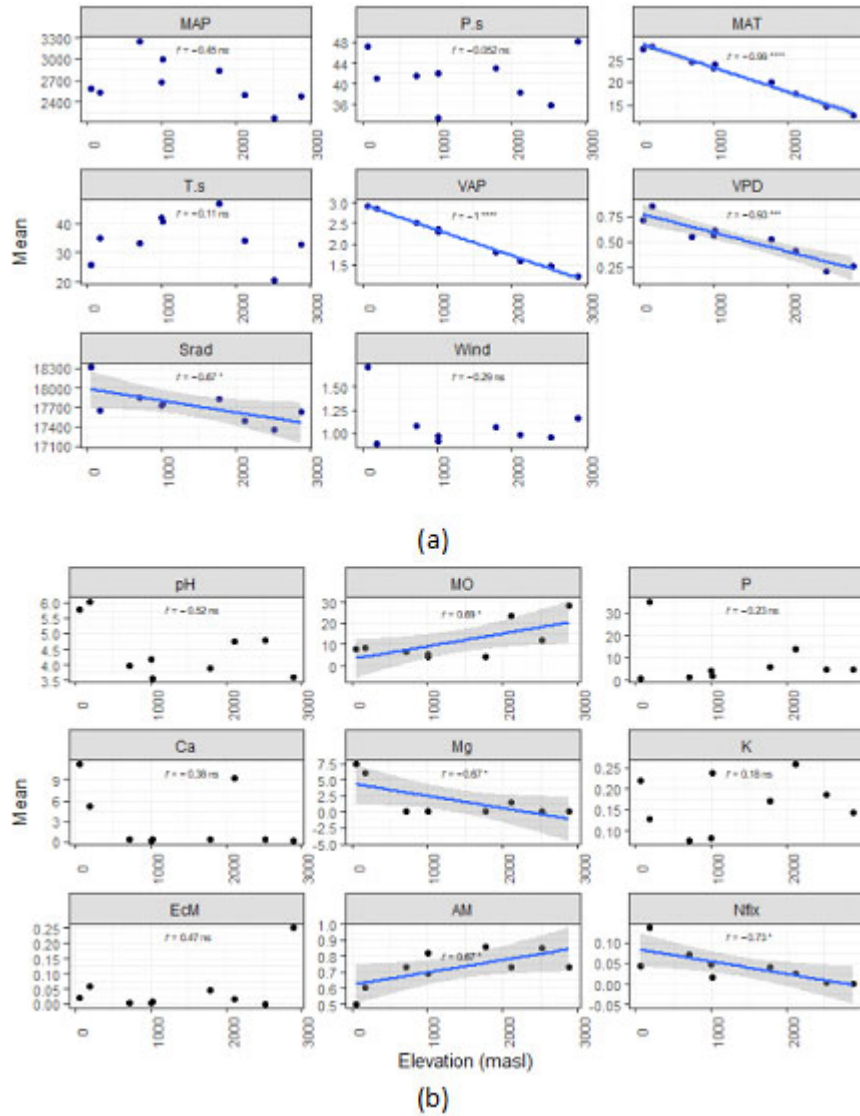

**Figure S3.** Distribution of the functional group abundance along elevational gradient (a) and plot of the first two RLQ axes with environmental variables (b). MAT: mean annual temperature (°C), MAP: mean annual precipitation (mm), T.s: temperature seasonality (°C), P.s: precipitation seasonality (mm), VAP: water vapor pressure (KPa), Wind: wind speed (m/s), SRad: Solar radiation (KJ m<sup>-1</sup> day<sup>-1</sup>), DVP: Vapor pressure deficit (KPa). MO: organic matter (%), Ca (calcium), Mg (magnesium), and K (potassium) cations (meq per 100 g soil), P: phosphorus (ppm), probability of association per place with EcM (ectomycorrhizas), AM (arbuscular mycorrhizas), and Nfix (nitrogen-fixing bacteria).

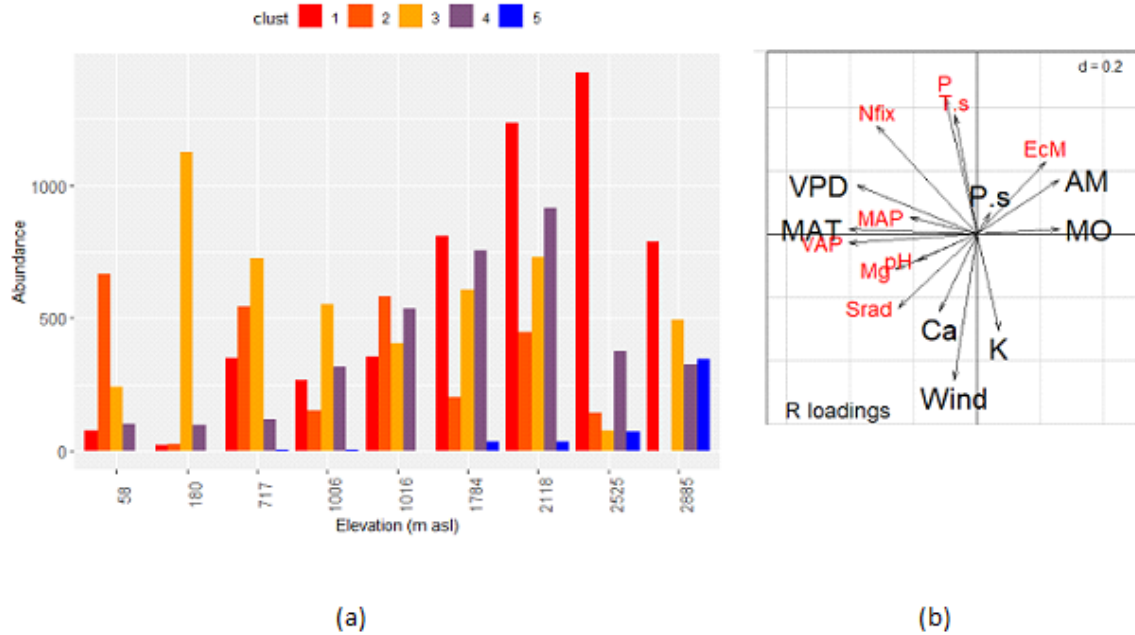

## Plot Establishment and Trait Sampling

### *Plot Establishment*

The nine one-hectare plots were randomly located, seeking to cover the elevation gradient without assuming any prior criteria in terms of their floristic composition, structure, climate, or soils. For this, we selected protected forest fragments to ensure no disturbance and permanence over time. Once the site was identified, a point was randomly selected within the forest, at least 100 m away from the forest edge.

The plots were georeferenced based on the starting corner. The establishment and delimitation were performed using a Warrent Knight level compass, clinometer, or digital hypsometer, poles, and measuring tape to form a network of 10 × 10 meter subplots (100 subplots), delimited by PVC tubes at the vertices marked according to the Cartesian coordinate system. The azimuth, direction, of the two perpendicular lines was recorded for each plot. The plot was made up of five strips of 20 × 100, each of which contained five quadrants of 20 × 20, which were numbered according to the coordinate of the lower left vertex. Hence, the first quadrant of the first strip was labelled the 0–0 quadrant, the second 0–20, quadrant 25 was denoted as 80–80, and so forth.

### *Trait measurement*

The measurement of functional traits was conducted following the methodology proposed in the “New handbook for standardized measurement of plant functional traits worldwide” [1]. We took samples from understory species as well as canopy species, sampling the less-shaded branch. Fresh weight, thickness, and toughness were measured immediately. Then, the collected leaves were wrapped, moistened, and hermetically packed to avoid dehydration to complete the trait measurement in the laboratory of Biodiversity of the National University of Colombia.

We used the software ImageJ (<http://rsbweb.nih.gov/ij/> 28 01 2015 -15 07 2019) to quantify the leaf area (LA) with the petiole. Leaf thickness (LT) was measured with a digital micrometer (Mitutoyo, precision 0.0001 mm), and leaf toughness (Lth) was measured using a Pesola Medio-Line Pressure Set adopted to Spring Scales (300, 600, and 1200 g of capacity, rod diameter 3.16 mm). LT and Lth were measured three times per leaf using fresh leaves and avoiding leaf veins. To calculate the leaf dry matter content (LDMC), each sampled leaf was placed in a separate paper bag and dried in the oven for 72 hours (60 °C), to later be weighed in an analytical balance with a precision of 0.0001 g. Subsequently, we estimated the specific leaf area (SLA) as the ratio between LA and LDMC. Wood density (WD) was measured for mature canopy trees using samples from branches. The bark was removed from each sample and rehydrated for 24 hours, and the volume was then estimated through water displacement. Samples were then placed in the oven at 70°C until a constant weight was achieved to measure dry weight.

1. Perez-Harguindeguy, N.; Díaz, S.; Garnier, E.; Lavorel, S.; Poorter, H.; Jaureguiberry, P.; Cornwell, W.K.; Craine, J.M.; Gurvich, D.E.; Urcelay, C.; et al. New handbook for standardised measurement of plant functional traits worldwide. *Aust. J. Bot.* **2016**, *64*, 715–716.
